# Supplementary material
Source: HighWire-hosted journal article supplement (https://bmjopen.bmj.com/content/9/8/e026729)
Supplement: inline-supplementary-material-1 [file inline-supplementary-material-1.pdf]

| Original Version                                                       | Chinese Version              |
|------------------------------------------------------------------------|------------------------------|
| 1. My child is constantly sampling new and different (variety) foods.* | 1. 我的孩子不断尝试新的不同种类的食物.        |
| 2. My child does not trust new foods.                                  | 2. 我的孩子不信任/不放心没吃过的新食物.       |
| 3. If my child doesn't know what's in a food, s/he won't try it.       | 3. 如果我的孩子不知道食物里有什么, 她/他不会尝试. |
| 4. My child is afraid to eat things s/he has never had before.         | 4. 我的孩子害怕吃她/他从来没有吃过的东西.      |
| 5. My child is very particular about the foods s/he will eat.          | 5. 我的孩子对她/他吃的东西很挑剔.          |
| 6. My child will eat almost anything.*                                 | 6. 我的孩子几乎什么食物都吃.             |

\*reverse scored
